# Supplementary material for: Achieving very high performance polybenzoxazines from natural renewable isoliquiritigenin: design, preparation and property investigation
Source: Royal Society of Chemistry journal article supplement (doi:10.1039/d5py00311c), 2025-01-01
Supplement: d5py00311c1.pdf [file d5py00311c1.pdf]

**Supporting Information**

**Achieving very high performance polybenzoxazines from natural renewable isoliquiritigenin: Design, preparation and property investigation**

Xie Lin and Kan Zhang\*

Institute of Polymer Materials, School of Materials Science and Engineering, Jiangsu University,  
Zhenjiang 212013, China.

\*: To whom correspondence should be addressed:

Kan Zhang: zhangkan@ujs.edu.cn

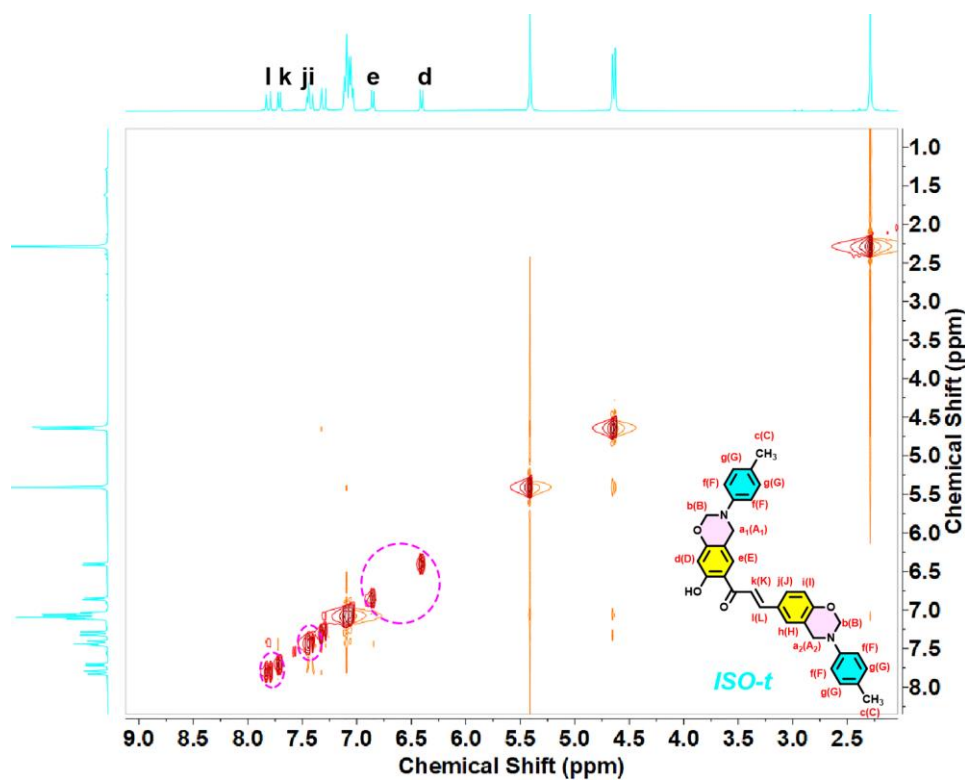

**Figure S1.** 2D  $^1\text{H}$ - $^1\text{H}$  NOESY NMR spectrum of **ISO-t** in  $\text{CDCl}_3$ .

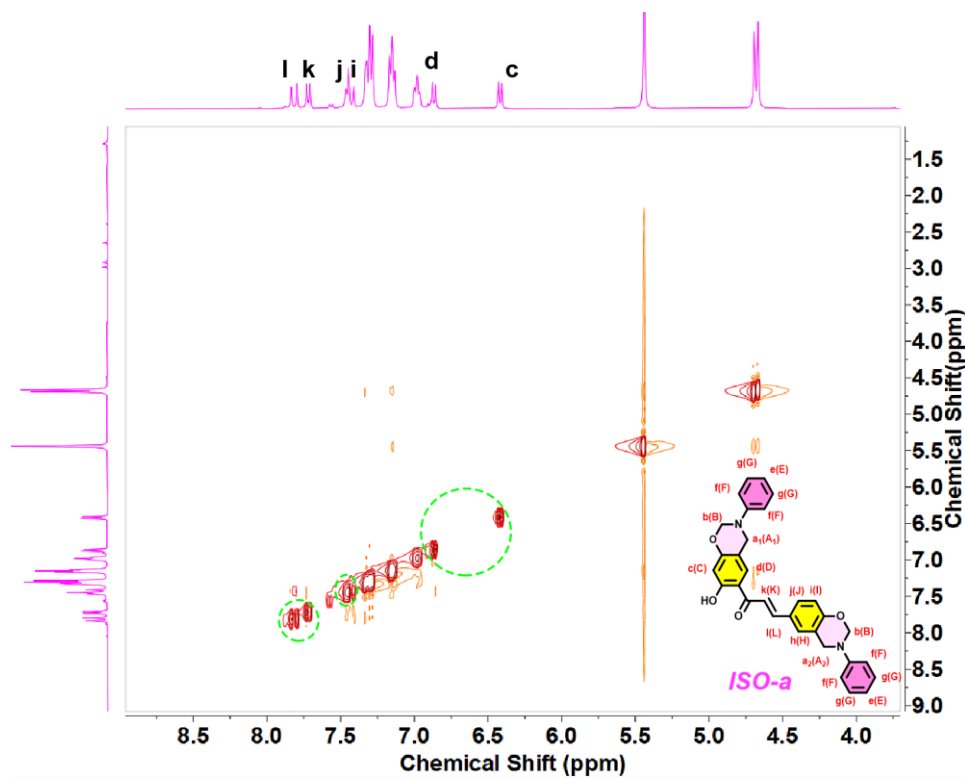

**Figure S2.** 2D  $^1\text{H}$ - $^1\text{H}$  NOESY NMR spectrum of **ISO-a** in  $\text{CDCl}_3$ .

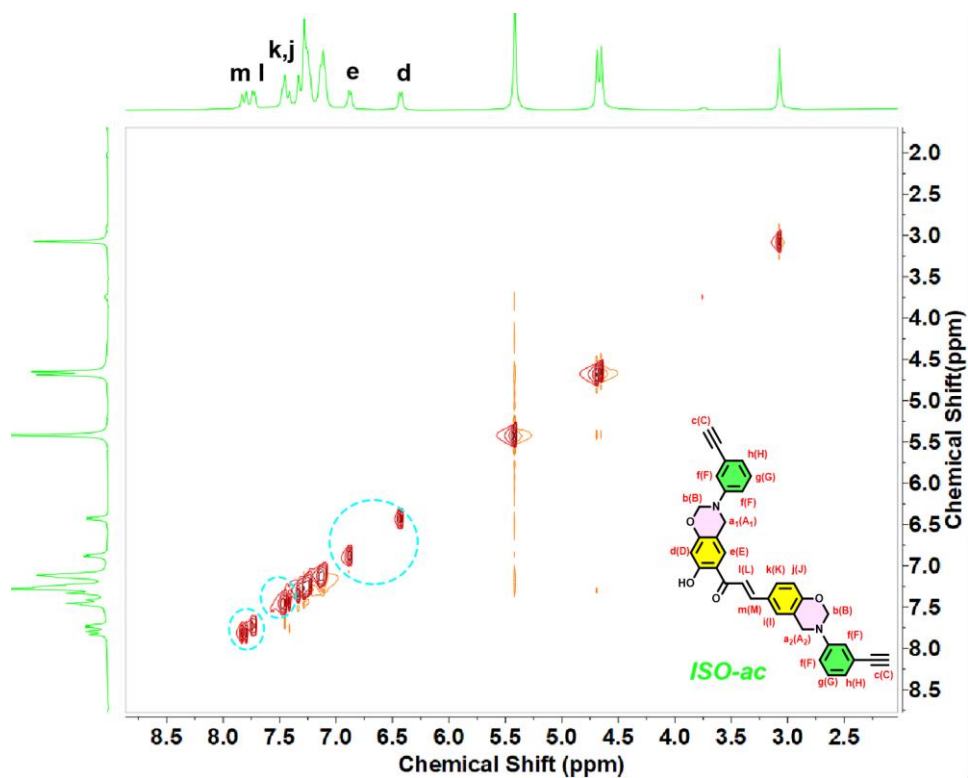

Figure S3. 2D  $^1\text{H}$ - $^1\text{H}$  NOESY NMR spectrum of **ISO-ac** in  $\text{CDCl}_3$ .

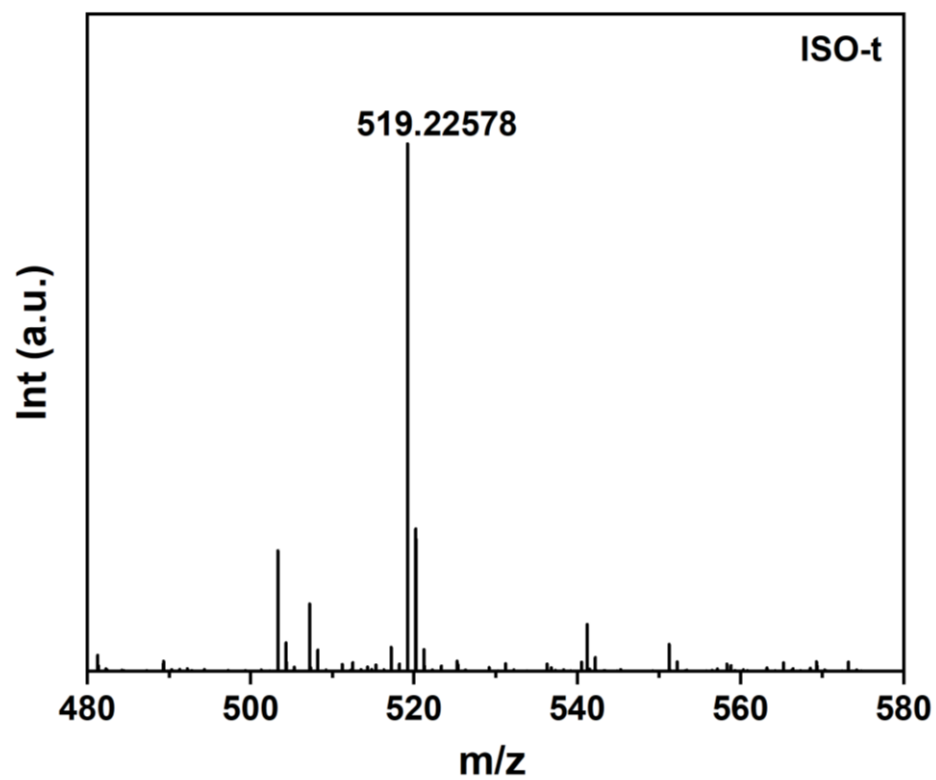

Figure S4. HR-MS spectrum of **ISO-t**.

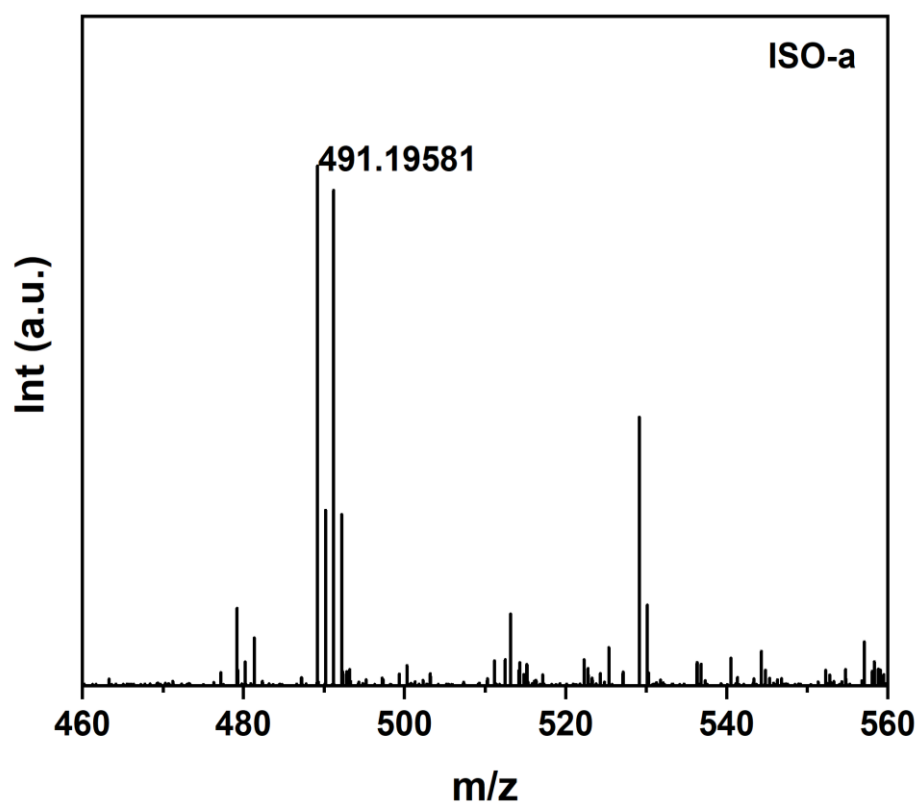

Figure S5. HR-MS spectrum of ISO-a.

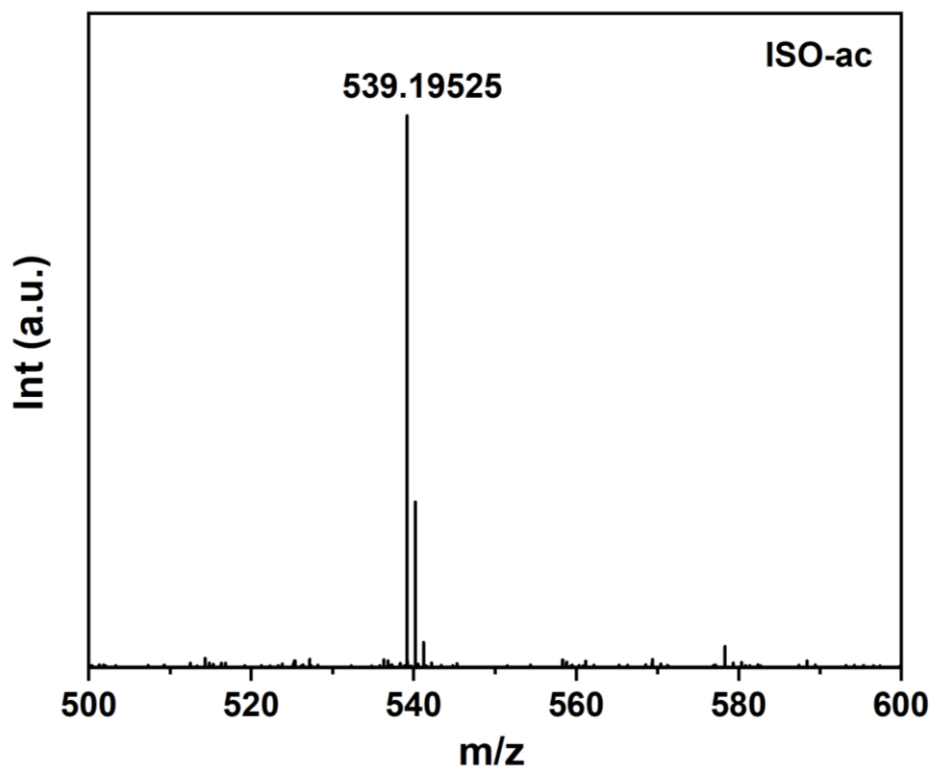

Figure S6. HR-MS spectrum of ISO-ac.

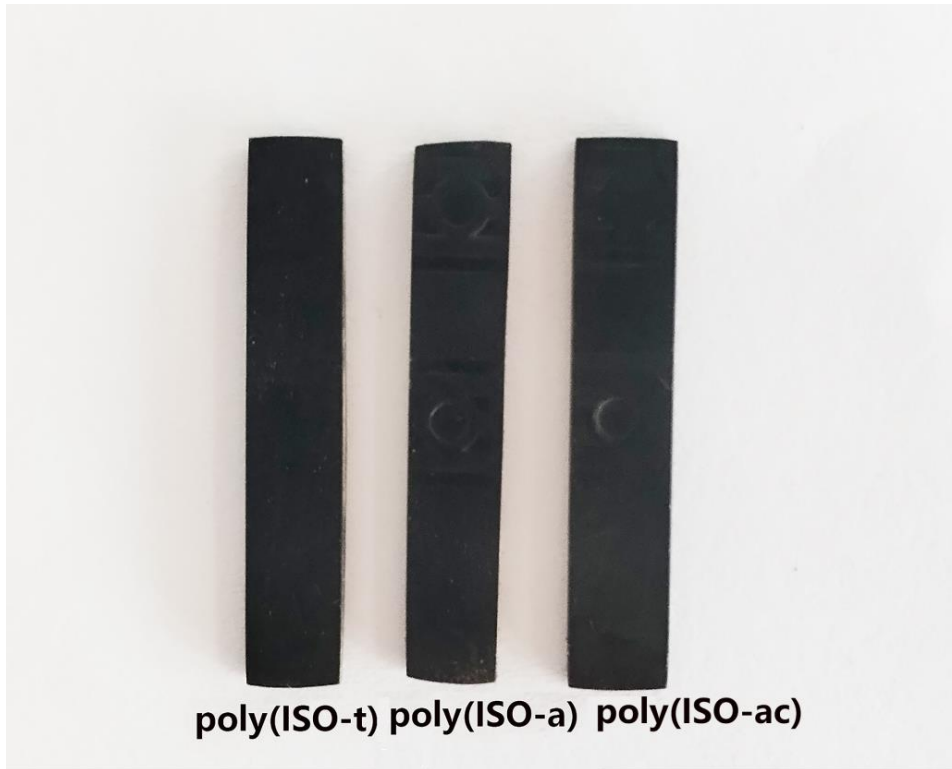

**Figure S7.** Sample images of Dynamic mechanical analysis.

### Swelling tests and calculation of the crosslinking density

The swelling percentage was calculated from the mass changes using the following equation (S1):

$$Swelling(\%) = \frac{W_2 - W_1}{W_1} \times 100 \quad \text{equation (S1)}$$

$W_1$  and  $W_2$  are the weight (g) of the initial sample and the weight of the sample after immersion, respectively. Then, using the Flory–Rehner equation [Equations (S2)–(S4)] and the results of the swelling test, the cross-linking density can be calculated.

$$M_C = \frac{-\rho_P V_S V_r^{1/3}}{\ln(1 - V_r) + V_r + \chi V_r^2} \quad \text{equation (S2)}$$

$$V_r = \frac{1}{1 + Q_m} \quad \text{equation (S3)}$$

$$V_c = \frac{1}{2M_c} \quad \text{equation (S4)}$$

where  $M_C$  is the molecular weight between the crosslinking nodes,  $\rho_P$  is the density of the polybenzoxazines ( $V_S$  is the molar volume of the solvent ( $V_S$  toluene

$=106.8 \text{ cm}^3/\text{mol}$ ),  $\chi$  is the interaction coefficient between the polybenzoxazines-solvent, which we took the hypothesis that  $\chi$  approximated to 0.5,  $V_r$  is the volume fraction of the polymer in the swollen specimen,  $Q_m$  is the increased weight of polybenzoxazines in toluene, and  $V_c$  is the cross-link density.
